# Supplementary material for: A Comprehensive Library of Familial Human Amyotrophic Lateral Sclerosis Induced Pluripotent Stem Cells
Source: PubMed Central journal article supplement (PMC4356618; doi:10.1371/journal.pone.0118266), 2015-03-11

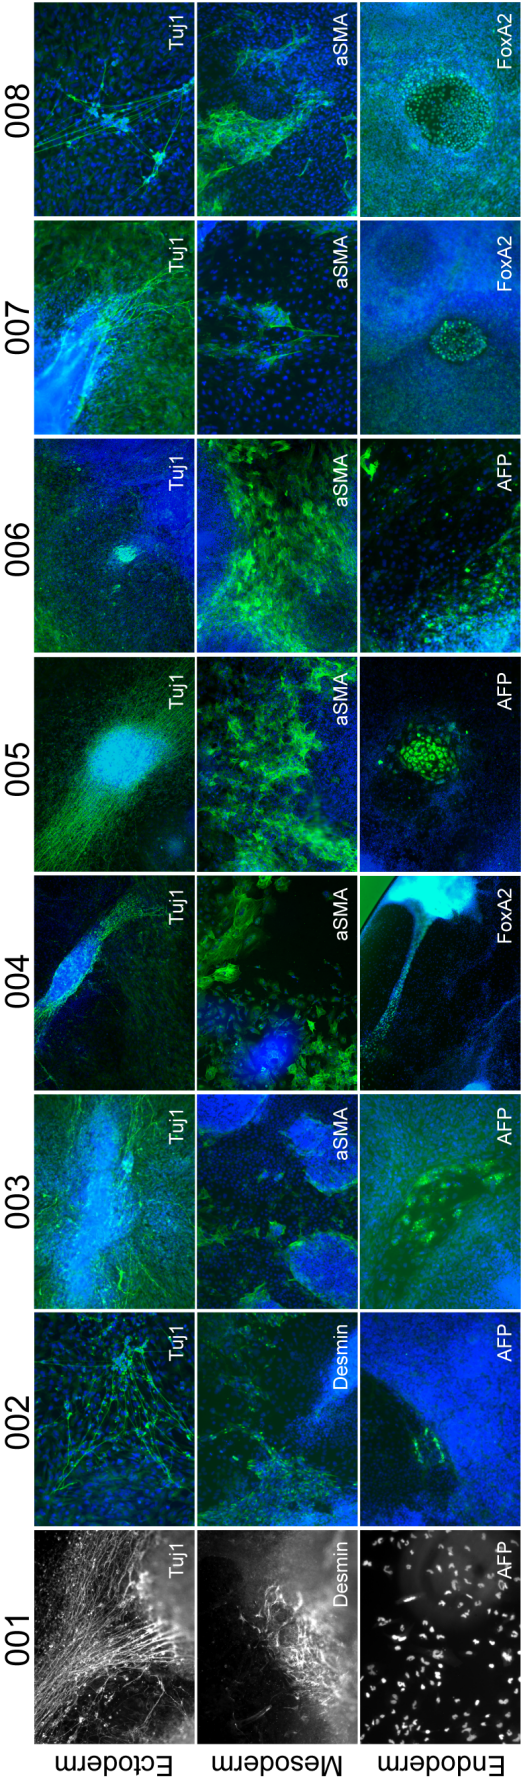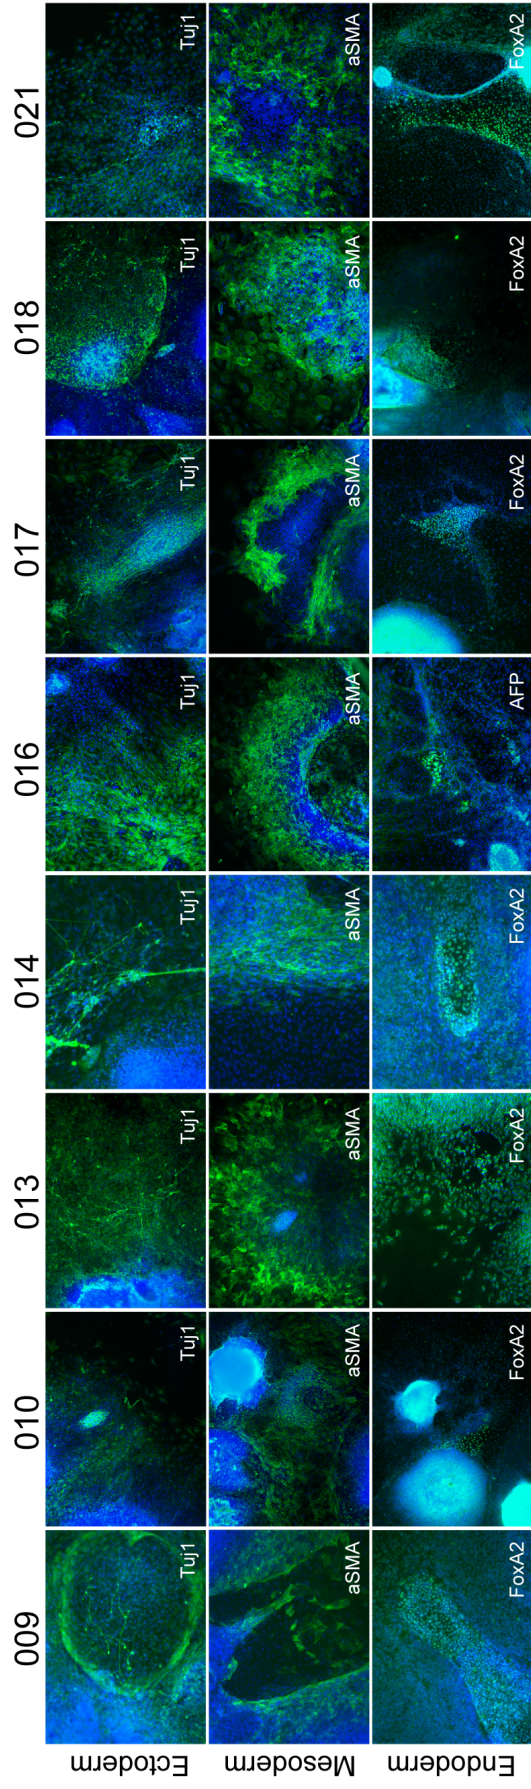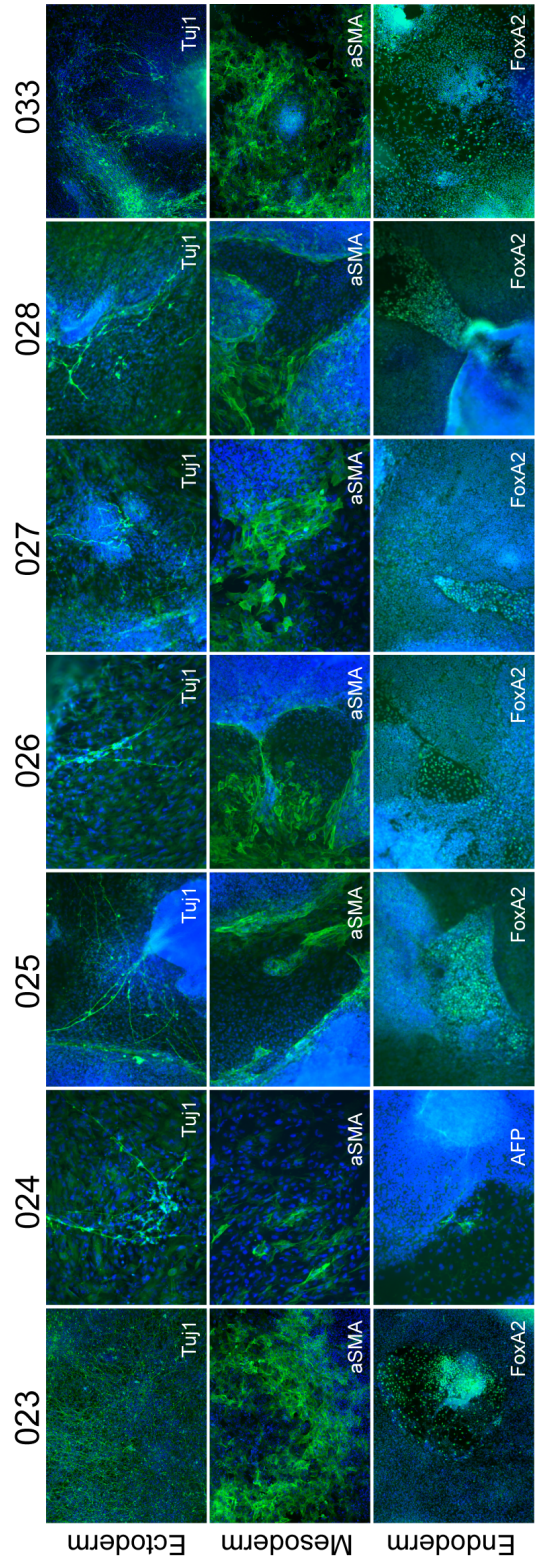

008

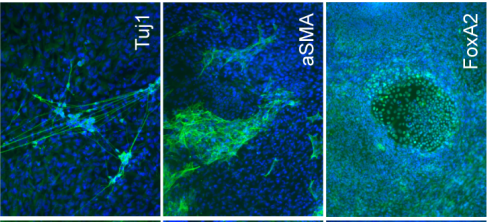

007

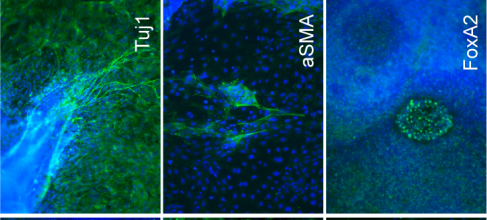

006

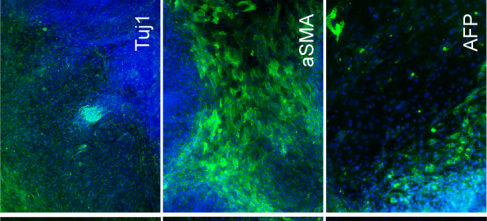

005

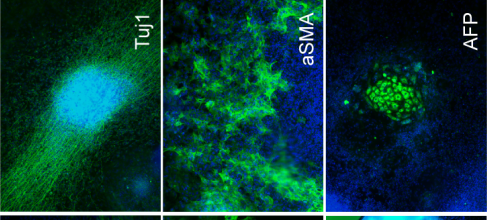

004

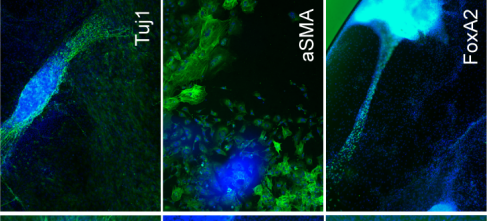

003

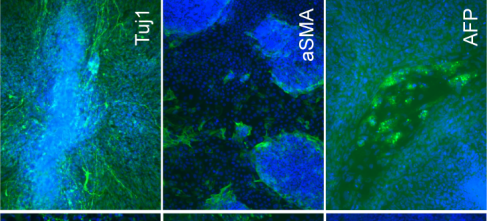

002

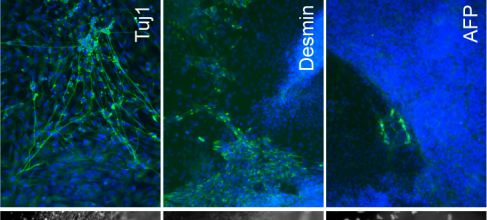

021

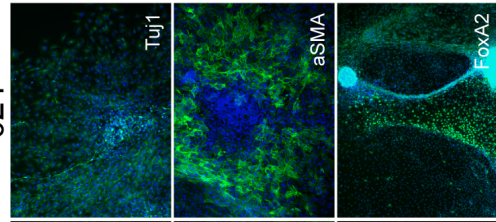

018

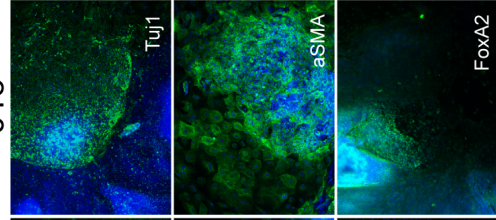

017

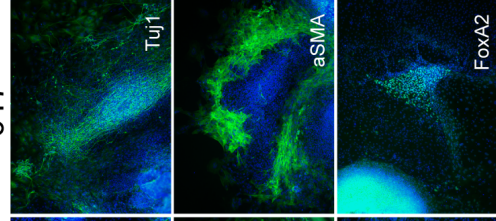

016

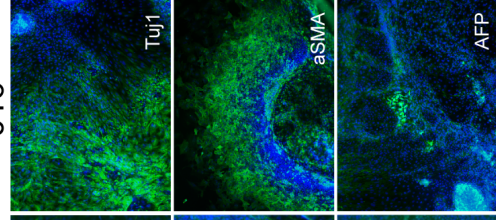

014

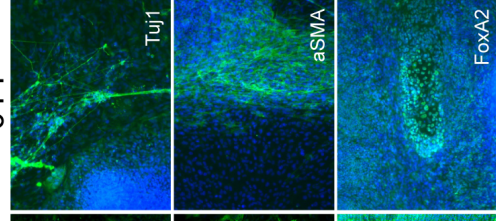

013

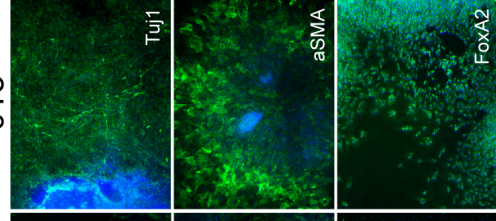

010

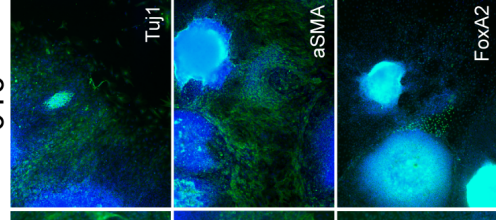

033

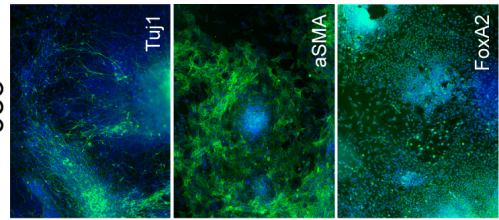

028

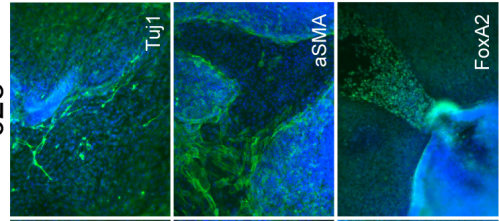

027

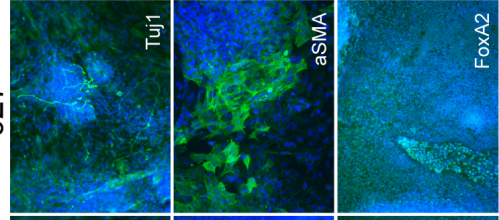

026

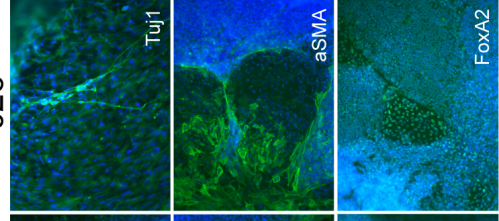

025

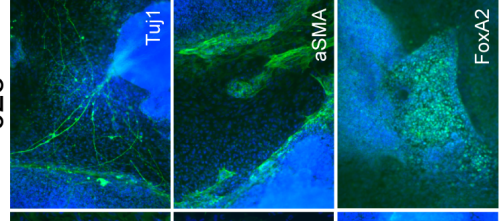

024

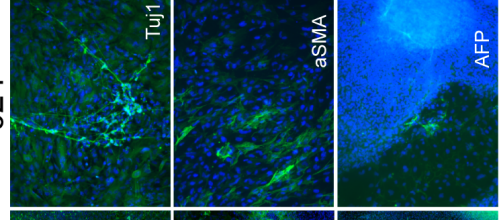

Supplement: pone.0118266.s002.pdf [file pone.0118266.s002.pdf]
