# Supplementary material for: A Comprehensive Library of Familial Human Amyotrophic Lateral Sclerosis Induced Pluripotent Stem Cells
Source: PubMed Central journal article supplement (PMC4356618; doi:10.1371/journal.pone.0118266), 2015-03-11

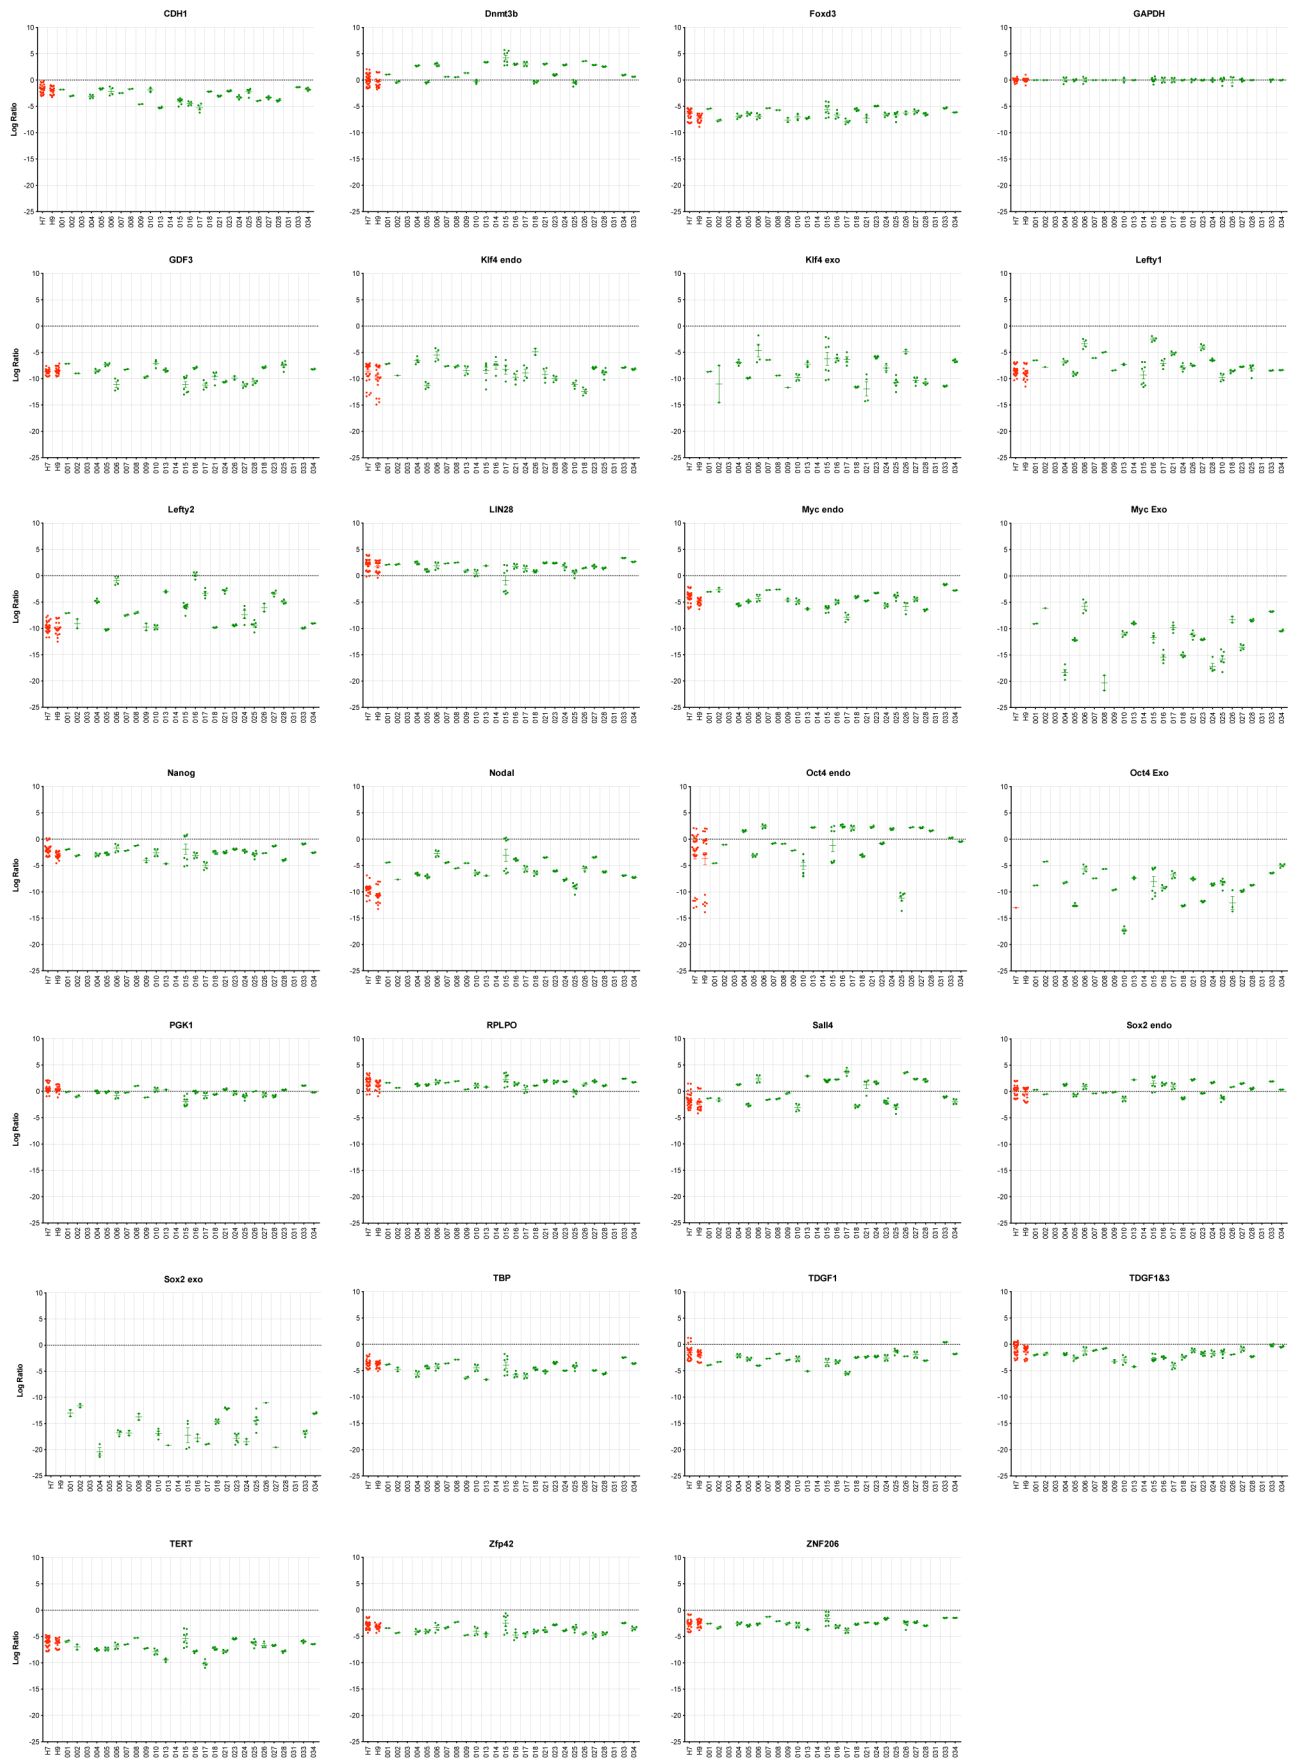

Supplement: pone.0118266.s001.pdf [file pone.0118266.s001.pdf]
