# Supplementary material for: A Comprehensive Library of Familial Human Amyotrophic Lateral Sclerosis Induced Pluripotent Stem Cells
Source: PubMed Central journal article supplement (PMC4356618; doi:10.1371/journal.pone.0118266), 2015-03-11
Supplement: pone.0118266.s003.pdf [file pone.0118266.s003.pdf]

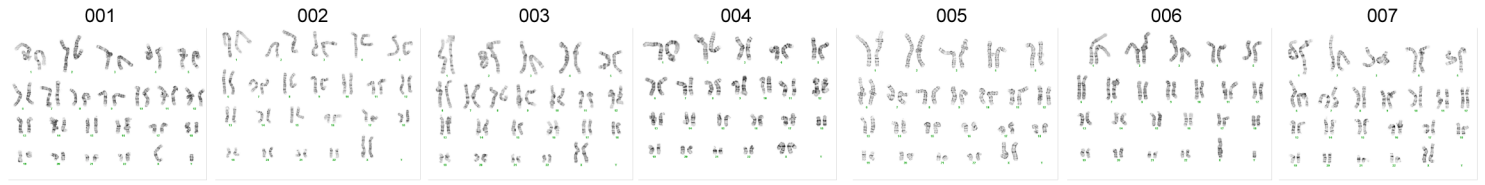

P10  
46, XY[20]

P4  
46, XX[20]

P5  
46, XX[20]

P4  
46, XX[20]

P7  
46, XX[20]

P7  
46, XY[20]

P5  
46, XX[19]

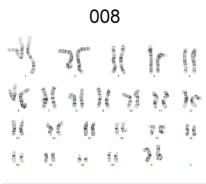

P5  
46, XX[20]

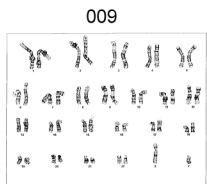

P5  
46, XY[17]

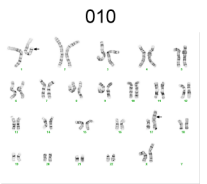

P8  
46, XX,t(1:17)(q32;p13)[20]

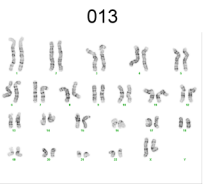

P4  
46, XX[20]

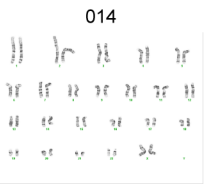

P6  
46, XX[18]

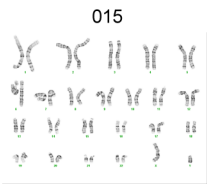

P5  
46, XY[19]

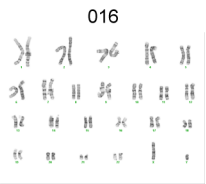

P5  
46, XY[19]

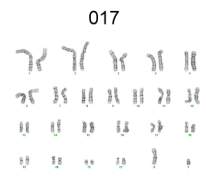

P6  
46, XY[14]

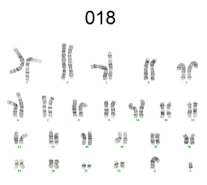

P6  
46, XY[19]

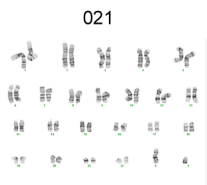

P5  
46, XY[19]

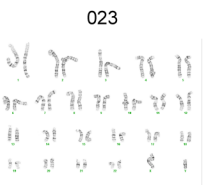

P6  
46, XY[19]

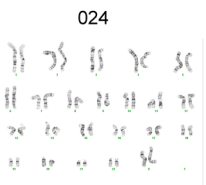

P4  
46, XX[20]

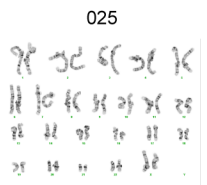

P4  
46, XX[20]

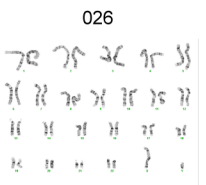

P6  
46, XY[20]

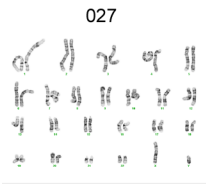

P6  
46, XY[20]

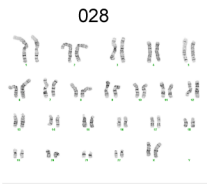

P6  
46, XX[20]

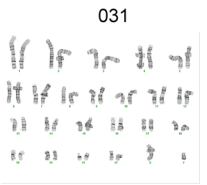

P6  
46, XY[17]

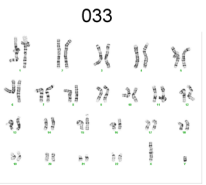

P9  
46, XY[20]

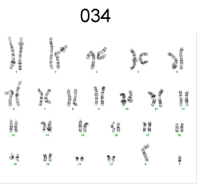

P6  
46, XY[20]
